# Supplementary material
Source: Elsevier journal article supplement (https://www.sciencedirect.com/science/article/pii/S0211139X1600041X)
Supplement: mmc1 [file S0211139X1600041X:mmc1.docx]

Material Suplementario 1. Asociaciones estadísticamente significativas entre los diferentes tipos de maltrato estudiados y las demás variables estudiadas en los sujetos que padecían maltrato solo tras el ingreso en la residencia o maltrato no-institucional (n=20).

| Tipo de Maltrato | Variable | Chi-cuadrado | Significación (*p*) | Riesgo Relativo |
| --- | --- | --- | --- | --- |
| Económico |  |  |  |  |
|  | Usuarios | 4.091 | 0.043 | 0.636 |
| Físico | - | - | - | - |
| Por Negligencia |  |  |  |  |
|  | Centro | 6.785 | 0.009 | 2.750 |
|  | Hijo | 4.500 | 0.034 | 2.500 |
|  | Usuarios | 9.000 | 0.003 | 0.250 |
|  | Otros | 4.500 | 0.034 | 1.500 |
| Sexual |  |  |  |  |
|  | Sexo | 4.314 | 0.038 | 1.500 |
|  | Usuarios | 4.314 | 0.038 | 1.500 |
| Psicológico |  |  |  |  |
|  | Nº de maltratos | 6.154 | 0.046 | - |
